# Supplementary material for: Triiron clusters derived from dinuclear complexes related to the active site of [Fe–Fe] hydrogenases: steric effect of the dithiolate bridge on redox properties, a DFT analysis
Source: Royal Society of Chemistry journal article supplement (doi:10.1039/d1qi00006c), 2021-01-01
Supplement: d1qi00006c1.pdf [file d1qi00006c1.pdf]

## -Supplementary Information -

# Triiron clusters derived from dinuclear complexes related to the active site of [Fe-Fe] hydrogenases: Steric effect of the dithiolate bridge on redox properties, a DFT analysis.

Ahmad Hobballah,<sup>a</sup> Federica Arrigoni,<sup>\*,c</sup> Catherine Elleouet,<sup>\*,a</sup> Claudio Greco,<sup>\*,b</sup> Maxime Laurans,<sup>a</sup> François Y. Pétilon,<sup>a</sup> Philippe Schollhammer,<sup>\*,a</sup>

---

<sup>a</sup> UMR CNRS 6521, Université de Bretagne Occidentale, Brest, France.

<sup>b</sup> Department of Earth and Environmental Sciences University of Milan-Bicocca, Piazza della Scienza, 1, 20126 Milan, Italy.

<sup>c</sup> Department of Biotechnology and Biosciences, University of Milan-Bicocca, Piazza della Scienza, 2, 20126 Milan, Italy

**Table S1.** IR and <sup>31</sup>P{<sup>1</sup>H} spectroscopic data for **6-7**.

**Figure S1.** a) IR (CH<sub>2</sub>Cl<sub>2</sub>), b) <sup>31</sup>P{<sup>1</sup>H} NMR (CDCl<sub>3</sub>) spectra of **7** at 25°C.

**Figure S2.** ORTEP view of [ $\{\text{Fe}_2(\text{CO})_5(\mu\text{-pdt}^{\text{Et}2})\}_2(\mu\text{-dppe})$ ] (**6**)

**Table S2.** Selected distances for **6**.

**Table S3.** Crystallographic data of [ $\{\text{Fe}_2(\text{CO})_5(\mu\text{-pdt}^{\text{Et}2})\}_2(\mu\text{-dppe})$ ] (**6**)

**Table S4.** Selected bond (Å) and angles (°) for complexes **1**, **2** and **3**, theory vs. experiment

**Table S5.** Crystallographic data of [ $\text{Fe}_3(\text{CO})_5(\kappa^2\text{-dppe})(\mu\text{-pdt}^{\text{Et}2})(\mu\text{-pdt})$ ]<sub>2</sub>.CH<sub>2</sub>Cl<sub>2</sub> (**12**)<sub>2</sub>.CH<sub>2</sub>Cl<sub>2</sub> and [ $\text{Fe}_3(\text{CO})_5(\kappa^2\text{-dppe})(\mu\text{-pdt}^{\text{Bn}2})(\mu\text{-pdt})$ ] (**3**)

**Table S6.** Natural Bond Orbital (NBO) and Mulliken analysis of atomic charges on Fe1, Fe2 and Fe3 atoms in **1** and **3**.

**Figure S3.** (a) IR (CH<sub>2</sub>Cl<sub>2</sub>) and (b) <sup>31</sup>P{<sup>1</sup>H} NMR (CDCl<sub>3</sub>) spectra of **2** at 25°C; (c) IR (CH<sub>2</sub>Cl<sub>2</sub>) and (d) <sup>31</sup>P{<sup>1</sup>H} NMR (CDCl<sub>3</sub>) spectra of **3** at 25°C.

**Figure S4.** <sup>1</sup>H NMR spectrum of **2** (a) and **3** (b) in CDCl<sub>3</sub> at 25°C.

**Figure S5.** <sup>13</sup>C{<sup>1</sup>H}(Jmod) NMR spectrum of **2** in CDCl<sub>3</sub>.

**Scheme S1.** Reaction between [ $\text{Fe}_2(\text{CO})_6(\mu\text{-pdt})$ ] and [ $\text{Fe}(\text{CO})_2(\kappa^2\text{-dppe})(\kappa^2\text{-pdt}^{\text{Et}2})$ ].

**Scheme S2.** Reaction between [ $\text{Fe}_2(\text{CO})_6(\mu\text{-pdt}^{\text{Et}2})$ ] and [ $\text{Fe}(\text{CO})_2(\kappa^2\text{-dppe})(\kappa^2\text{-pdt}^{\text{Et}2})$ ].

**Figure S6.** IR ( $\text{CH}_2\text{Cl}_2$ ) spectra of  $[\text{Fe}_2(\text{CO})_4(\kappa^2\text{-dppe})(\mu\text{-pdt})]$  (black curve) and  $[\text{Fe}_2(\text{CO})_4(\mu\text{-dppe})(\mu\text{-pdt}^{\text{Et}_2})]$  (**8**) (red curve).

**Spectroscopic data for  $[\text{Fe}_2(\text{CO})_4(\mu\text{-dppe})(\mu\text{-pdt}^{\text{Et}_2})]$  (**8**)**

**Figure S7.** ORTEP view of  $[\text{Fe}_2(\text{CO})_4(\mu\text{-dppe})(\mu\text{-pdt}^{\text{Et}_2})]$  (**8**)

**Table S7.** Selected distances and bond angles for **8**.

**Table S8.** Crystallographic data of  $[\text{Fe}_2(\text{CO})_4(\mu\text{-dppe})(\mu\text{-pdt}^{\text{Et}_2})]_2 \cdot 2\text{CH}_2\text{Cl}_2$

**Figure S8.** HOMO-1, HOMO-2 and HOMO-3 of **1**.

**Table S9.** Energy (eV) of the HOMO and LUMO orbitals of the complexes **1-4**, **9**

**Figure S9.** Scan rate dependence of the current function for the oxidation (a) and the reduction (b) of complexes **1-4** under inert atmosphere in  $\text{CH}_2\text{Cl}_2\text{-}[\text{NBu}_4][\text{PF}_6]$  0.2 M.

**Figure S10.** a) Oxidation of  $[\text{Fe}_3(\text{CO})_5(\kappa^2\text{-dppe})(\mu\text{-pdt}^{\text{Bn}_2})(\mu\text{-pdt})]$  (**3**) (0.91 mM) under inert atmosphere in  $\text{CH}_2\text{Cl}_2\text{-}[\text{NBu}_4][\text{PF}_6]$  0.2 M at different scan rates. b) Successive cyclic voltammograms at  $0.2 \text{ V s}^{-1}$ .

**Figure S11.** Comparison between cyclic voltammetry under Ar and CO for complexes **1-4** in  $\text{CH}_2\text{Cl}_2\text{-}[\text{NBu}_4][\text{PF}_6]$  0.2 M at  $\nu = 0.2 \text{ V s}^{-1}$ .

**Scheme S3.** Hypotheses for the reaction associated to the oxidation of triiron complexes

**Figure S12.** IR monitoring of the reaction of **1** in  $\text{CH}_2\text{Cl}_2$  at  $-60^\circ\text{C}$  with 1 equiv. of  $[\text{FeCp}_2][\text{BAr}^{\text{F}}_4]$  (black curve: before; red curve: after addition of  $[\text{FeCp}_2][\text{BAr}^{\text{F}}_4]$ ).

**Figure S13.** Reduction of  $[\text{Fe}_3(\text{CO})_5(\kappa^2\text{-dppe})(\mu\text{-pdt})_2]$  (**1**) (1.52 mM) under Ar and CO in  $\text{CH}_2\text{Cl}_2\text{-}[\text{NBu}_4][\text{PF}_6]$  0.2 M at slow scan rates.

**Figure S14.** Scan rate dependence of the reduction current functions ( $i_p^{\text{red}}/\nu^{1/2}$ ) for the reduction of **2** (1.20 mM) in  $\text{CH}_2\text{Cl}_2\text{-}[\text{NBu}_4][\text{PF}_6]$  0.2 M under Ar and CO.

**Figure S15.** Reduction of  $[\text{Fe}_3(\text{CO})_5(\kappa^2\text{-dppe})(\mu\text{-pdt})_2]$  (**1**) (1.52 mM) under Ar and CO in  $\text{CH}_2\text{Cl}_2\text{-}[\text{NBu}_4][\text{PF}_6]$  0.2 M at slow scan rates.

**Figure S16.** MO's energy diagram (left). Representation of MO discussed in the text (right).

**Figure S17.** IR monitoring of the reaction of **1** (a), **2** (b) with with 2 equiv. of  $\text{HBF}_4 \cdot \text{Et}_2\text{O}$  at  $-80^\circ\text{C}$  in  $\text{CH}_2\text{Cl}_2$  (black curve: before; red curve: after addition of acid).

**Figure S18.**  $^1\text{H}$  (a), (c) and  $^{31}\text{P}\{^1\text{H}\}$  (b), (d) NMR monitoring, at variable temperature, of the reaction of **1** (a), (b), **2** (c),(d) in the presence of 2 equiv.  $\text{HBF}_4 \cdot \text{Et}_2\text{O}$  in  $\text{CD}_2\text{Cl}_2$ .

**Figure S19.** IR monitoring of the reaction of **4** with  $\text{HBF}_4 \cdot \text{Et}_2\text{O}$  (2 equiv) at  $25^\circ\text{C}$  in  $\text{CH}_2\text{Cl}_2$  (black curve: before; red curve: after addition of acid).

**Figure S20.**  $^1\text{H}$  (a) and  $^{31}\text{P}\{^1\text{H}\}$  (b) NMR monitoring, at variable temperature, of the reaction of **4** in the presence of 2 equiv. of  $\text{HBF}_4 \cdot \text{Et}_2\text{O}$  in  $\text{CD}_2\text{Cl}_2$ .

**Figure S21.** Cyclic voltammetry of  $[\text{Fe}_3(\text{CO})_5(\kappa^2\text{-dpppe})(\mu\text{-pdt}^{\text{Et}_2})(\mu\text{-pdt})]$  (**2**) ( $C = 1.20 \text{ mM}$ ) in presence of  $\text{CF}_3\text{SO}_3\text{H}$  in  $\text{CH}_2\text{Cl}_2\text{-}[\text{NBu}_4][\text{PF}_6]$   $0.2 \text{ M}$  at  $\nu = 0.2 \text{ V s}^{-1}$  under Ar .

**Figure S22.** Cyclic voltammetry of **4** ( $2.2 \text{ mM}$ ) in presence of  $\text{CH}_3\text{SO}_3\text{H}$  (left) and  $\text{CF}_3\text{SO}_3\text{H}$  (right) in  $\text{CH}_2\text{Cl}_2\text{-}[\text{NBu}_4][\text{PF}_6]$   $0.2 \text{ M}$ .

**Table S1.** IR and  $^{31}\text{P}\{^1\text{H}\}$  spectroscopic data for **6-7**.

| Complex  | IR ( $\text{CH}_2\text{Cl}_2$ , $\text{cm}^{-1}$ ), $\bar{\nu}(\text{CO})$ | $^{31}\text{P}\{^1\text{H}\}$ NMR ( $\text{CDCl}_3$ , $\delta$ : ppm) |
|----------|----------------------------------------------------------------------------|-----------------------------------------------------------------------|
| <b>6</b> | 2044 (m), 1981 (s), 1960 (w), 1919 (w)                                     | 61.6 (s)                                                              |
| <b>7</b> | 2041 (m), 1983 (s), 1962 (w), 1921 (w)                                     | 61.9 (s)                                                              |

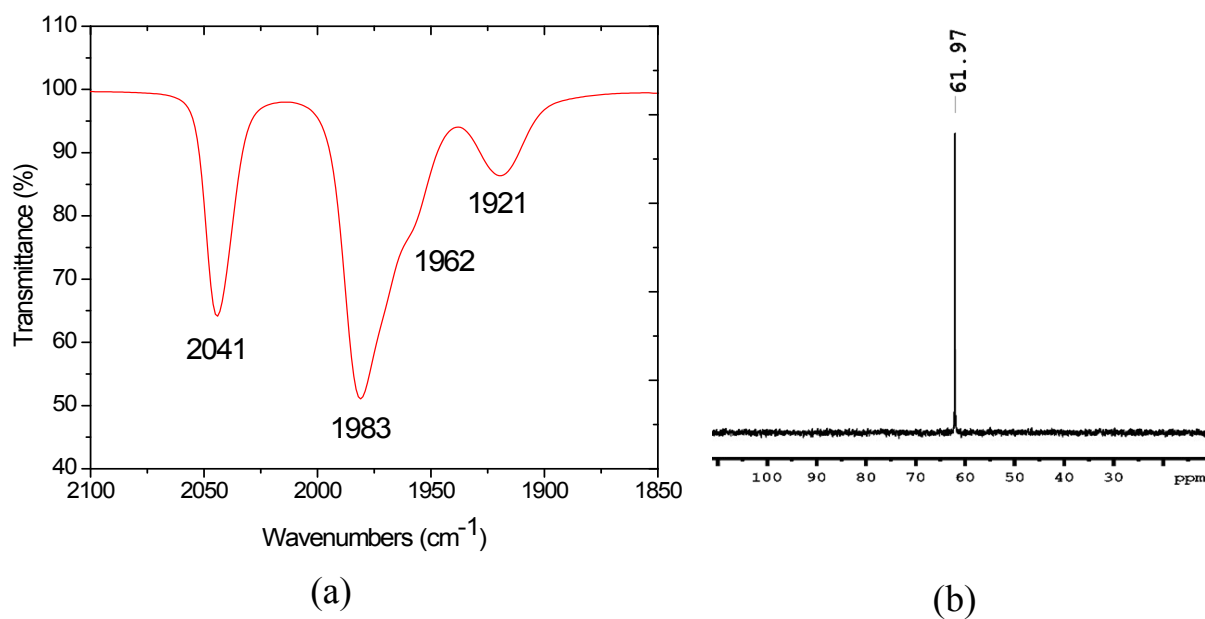

**Figure S1.** a) IR ( $\text{CH}_2\text{Cl}_2$ ), b)  $^{31}\text{P}\{^1\text{H}\}$  NMR ( $\text{CDCl}_3$ ) spectra of **6** at  $25^\circ\text{C}$ .

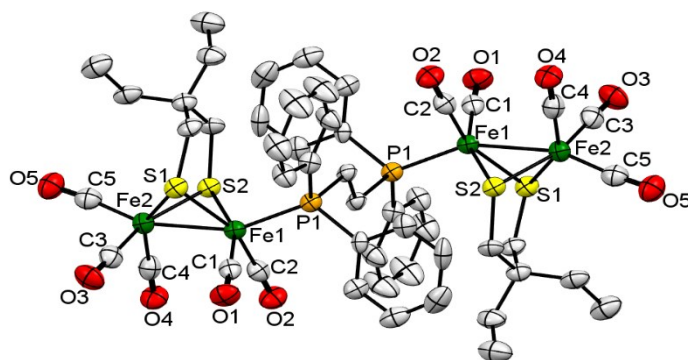

**Figure S2.** ORTEP view of  $[\{\text{Fe}_2(\text{CO})_5(\mu\text{-pdt}^{\text{Et}2})\}_2(\mu\text{-dppe})]$  (**6**)

**Table S2.** Selected distances for **6**.

| <b>6</b>     |            |            |
|--------------|------------|------------|
| Distance (Å) | Fe1-Fe2    | 2.5079(14) |
|              | Fe1-S1     | 2.2748(18) |
|              | Fe1-S2     | 2.2738(17) |
|              | Fe2-S1     | 2.277(2)   |
|              | Fe2-S2     | 2.2685(19) |
|              | Fe1-P1     | 2.220(2)   |
|              | Angles (°) | Fe2-Fe1-P1 |
| C5-Fe2-Fe1   |            | 158.0(2)   |
| Fe1-S1-Fe2   |            | 66.87(6)   |
| Fe1-S2-Fe2   |            | 67.03(5)   |

**Table S3.** Crystallographic data of [ $\{\text{Fe}_2(\text{CO})_5(\mu\text{-pdt}^{\text{Et}_2})\}_2(\mu\text{-dppe})$ ] (**6**)

| <b>6</b>                                                                              |                                                                          |
|---------------------------------------------------------------------------------------|--------------------------------------------------------------------------|
| Empirical formula                                                                     | $\text{C}_{50}\text{H}_{52}\text{Fe}_4\text{O}_{10}\text{P}_2\text{S}_4$ |
| Formula weight                                                                        | 1226.50                                                                  |
| Temperature/ K                                                                        | 150(2)                                                                   |
| Wavelength/Å                                                                          | 0.71073                                                                  |
| Crystal system                                                                        | Triclinic                                                                |
| Space group                                                                           | P -1                                                                     |
| <i>a</i> (Å)                                                                          | 11.0392(9)                                                               |
| <i>b</i> (Å)                                                                          | 11.3968(10)                                                              |
| <i>c</i> (Å)                                                                          | 11.9267(11)                                                              |
| $\alpha$ (°)                                                                          | 110.934(8)                                                               |
| $\beta$ (°)                                                                           | 94.419(7)                                                                |
| $\gamma$ (°)                                                                          | 110.140(8)                                                               |
| <i>V</i> (Å <sup>3</sup> )                                                            | 1281.07(19)                                                              |
| <i>Z</i>                                                                              | 1                                                                        |
| $\rho_{\text{calcd}}$ (Mg/mm <sup>3</sup> )                                           | 1.590                                                                    |
| $\mu$ (mm <sup>-1</sup> )                                                             | 1.393                                                                    |
| F(000)                                                                                | 630                                                                      |
| Crystal size (mm)                                                                     | 0.13 x 0.05 x 0.03                                                       |
| Crystal color                                                                         | Red                                                                      |
| Crystal shape                                                                         | Rounded plate // (0 0 1)                                                 |
| Range of $\theta$ (°)                                                                 | 3.47 to 26.37                                                            |
| Limiting indices                                                                      | $-13 \leq h \leq 13, -14 \leq k \leq 13, -14 \leq l \leq 14$             |
| Reflections                                                                           | 11                                                                       |
| collected/unique                                                                      | 8861 / 5210                                                              |
| $R_{\text{int}}$                                                                      | 0.0918                                                                   |
| Completeness to $\theta = 26.37$                                                      | 99.8 %                                                                   |
| Absorption correction                                                                 | Analytical                                                               |
| Max. / Min. Transmission                                                              | 0.9594 / 0.8397                                                          |
| Refinement method                                                                     | Full-matrix least-squares on $F^2$                                       |
| Data /Restraints /Parameters                                                          | 5210 / 0 / 318                                                           |
| $R_1$ [ $I > 2\sigma(I)$ ]                                                            | 0.0723                                                                   |
| $wR_2$ [ $I > 2\sigma(I)$ ]                                                           | 0.1102                                                                   |
| $R_1$ (all data)                                                                      | 0.1403                                                                   |
| $wR_2$ (all data)                                                                     | 0.1417                                                                   |
| Goodness of fit on $F^2$                                                              | 0.948                                                                    |
| $\Delta\rho_{\text{max}}, \Delta\rho_{\text{min}}$ [ $\text{e} \cdot \text{Å}^{-3}$ ] | 0.771, -0.666                                                            |

**Table S4:** Selected Bond (Å) and angles (°) for complexes **1**, **2** and **3**, theory vs. experiment

|              |                            | Complex 1*            |                  | Complex 2             |                  | Complex 3             |                 |
|--------------|----------------------------|-----------------------|------------------|-----------------------|------------------|-----------------------|-----------------|
|              |                            | Experiment            | Theory           | Experiment            | Theory           | Experiment            | Theory          |
| Distance (Å) | Fe1-Fe2                    | 2.5235(5)             | 2.574            | 2.5336(3)             | 2.576            | 2.5271(6)             | 2.578           |
|              | Fe2-Fe3                    | 2.5210(5)             | 2.581            | 2.5290(3)             | 2.560            | 2.5068(6)             | 2.543           |
|              | Fe1-CO <sub>terminal</sub> | 1.753(3)              | 1.742            | 1.7544(18)            | 1.743            | 1.750(3)              | 1.743           |
|              | Fe3-CO <sub>terminal</sub> | 1.785(3)-<br>1.805(3) | 1.778 -<br>1.786 | 1.789(2)-<br>1.803(2) | 1.779 -<br>1.790 | 1.786(4)-<br>1.794(4) | 1.777-<br>1.793 |
|              | Fe1-CO <sub>bridging</sub> | 2.314(3)              | 2.360            | 2.2719(17)            | 2.335            | 2.244(3)              | 2.330           |
|              | Fe2-CO <sub>bridging</sub> | 1.766(3)              | 1.754            | 1.7768(17)            | 1.757            | 1.783(3)              | 1.759           |
|              | Fe1-P1                     | 2.2354(7)             | 2.278            | 2.2436(5)             | 2.279            | 2.2641(9)             | 2.283           |
|              | Fe1-P2                     | 2.2559(7)             | 2.284            | 2.2533(5)             | 2.283            | 2.2417(8)             | 2.278           |
|              | Angles (°)                 | Fe1-Fe2-Fe3           | 159.484(19)      | 159.68                | 160.464(13)      | 158.98                | 160.77(2)       |
| Fe2-C2-O2    |                            | 157.5(2)              | 156.96           | 155.91(15)            | 156.53           | 155.7(2)              | 156.40          |
| Fe1-C2-O2    |                            | 127.39(19)            | 127.18           | 127.62(13)            | 126.88           | 127.5(2)              | 126.83          |
| Fe2-C2-Fe1   |                            | 75.06(9)              | 75.86            | 76.47(6)              | 76.57            | 76.79(12)             | 76.77           |
| Fe1-Fe2-C2   |                            | 62.39(8)              | 62.78            | 60.59(5)              | 61.87            | 59.83(9)              | 61.62           |
| P1-Fe1-P2    |                            | 87.45(3)              | 87.24            | 87.365(17)            | 87.3             | 87.04(3)              | 87.28           |

\* L. Beaume, M. Clémancey, G. Blondin, C. Greco, F. Y. Pétilion, P. Schollhammer, J. Talarmin, *Organometallics* **2014**, 33 (22), 6290–6293.

**Table S5.** Crystallographic data of  $[\text{Fe}_3(\text{CO})_5(\kappa^2\text{-dppe})(\mu\text{-pdt}^{\text{Et}_2})(\mu\text{-pdt})]_2 \cdot \text{CH}_2\text{Cl}_2$  (**[2]** $_2 \cdot \text{CH}_2\text{Cl}_2$ ) and  $[\text{Fe}_3(\text{CO})_5(\kappa^2\text{-dppe})(\mu\text{-pdt}^{\text{Bn}_2})(\mu\text{-pdt})]$  (**3**)

|                                                                          | <b>[2]<sub>2</sub> · CH<sub>2</sub>Cl<sub>2</sub></b>                                                         | <b>3</b>                                                                                     |
|--------------------------------------------------------------------------|---------------------------------------------------------------------------------------------------------------|----------------------------------------------------------------------------------------------|
| Empirical formula                                                        | C <sub>83</sub> H <sub>90</sub> Cl <sub>2</sub> Fe <sub>6</sub> O <sub>10</sub> P <sub>4</sub> S <sub>8</sub> | C <sub>51</sub> H <sub>48</sub> Fe <sub>3</sub> O <sub>5</sub> P <sub>2</sub> S <sub>4</sub> |
| Formula weight                                                           | 2033.91                                                                                                       | 1098.62                                                                                      |
| Temperature/ K                                                           | 150(2)                                                                                                        | 150(2)                                                                                       |
| Wavelength/Å                                                             | 0.71073                                                                                                       | 0.71073                                                                                      |
| Crystal system                                                           | Triclinic                                                                                                     | Monoclinic                                                                                   |
| Space group                                                              | P -1                                                                                                          | P 1 21/n 1                                                                                   |
| <i>a</i> (Å)                                                             | 10.7156(2)                                                                                                    | 12.9425(4)                                                                                   |
| <i>b</i> (Å)                                                             | 12.4815(2)                                                                                                    | 19.4734(5)                                                                                   |
| <i>c</i> (Å)                                                             | 18.9827(4)                                                                                                    | 19.9676(6)                                                                                   |
| $\alpha$ (°)                                                             | 73.604(2)                                                                                                     | 90                                                                                           |
| $\beta$ (°)                                                              | 89.158(2)                                                                                                     | 91.110(3)                                                                                    |
| $\gamma$ (°)                                                             | 66.590(2)                                                                                                     | 90                                                                                           |
| <i>V</i> (Å <sup>3</sup> )                                               | 2221.40(7)                                                                                                    | 5031.6(3)                                                                                    |
| <i>Z</i>                                                                 | 1                                                                                                             | 4                                                                                            |
| $\rho_{\text{calcd}}$ (Mg/mm <sup>3</sup> )                              | 1.520                                                                                                         | 1.450                                                                                        |
| $\mu$ (mm <sup>-1</sup> )                                                | 1.329                                                                                                         | 1.129                                                                                        |
| F(000)                                                                   | 1046                                                                                                          | 2264                                                                                         |
| Crystal size (mm)                                                        | 0.55 x 0.40 x 0.17                                                                                            | 0.27 x 0.19 x 0.04                                                                           |
| Crystal color                                                            | Dark red                                                                                                      | Dark red                                                                                     |
| Crystal shape                                                            | Planar truncated parallelepiped                                                                               | Rectangular plate (-1 0 1) [0 1 0]                                                           |
| Range of $\theta$ (°)                                                    | 3.45 to 30.51                                                                                                 | 3.30 to 26.37                                                                                |
| Limiting indices                                                         | -15 ≤ <i>h</i> ≤ 15, -17 ≤ <i>k</i> ≤ 17, -27 ≤ <i>l</i> ≤ 27                                                 | -14 ≤ <i>h</i> ≤ 16, -24 ≤ <i>k</i> ≤ 24, -24 ≤ <i>l</i> ≤ 24                                |
| Reflections collected/unique                                             | 39408 / 13550                                                                                                 | 28957 / 10255                                                                                |
| <i>R</i> <sub>int</sub>                                                  | 0.0362                                                                                                        | 0.0799                                                                                       |
| Completeness to $\theta = 26.37$                                         | 99.8                                                                                                          | 99.7 %                                                                                       |
| Absorption correction                                                    | Semi-empirical from equivalents                                                                               | Semi-empirical from equivalents                                                              |
| Max. / Min. Transmission                                                 | 0.8056 / 0.5284                                                                                               | 0.9562 / 0.7503                                                                              |
| Refinement method                                                        | Full-matrix least-squares on <i>F</i> <sup>2</sup>                                                            | Full-matrix least-squares on <i>F</i> <sup>2</sup>                                           |
| Data /Restraints /Parameters                                             | 13550 / 12 / 526                                                                                              | 10255 / 0 / 586                                                                              |
| <i>R</i> <sub>1</sub> [ <i>I</i> > 2σ( <i>I</i> )]                       | 0.0350                                                                                                        | 0.0464                                                                                       |
| <i>wR</i> <sub>2</sub> [ <i>I</i> > 2σ( <i>I</i> )]                      | 0.0857                                                                                                        | 0.1011                                                                                       |
| <i>R</i> <sub>1</sub> (all data)                                         | 0.0435                                                                                                        | 0.0706                                                                                       |
| <i>wR</i> <sub>2</sub> (all data)                                        | 0.0931                                                                                                        | 0.1159                                                                                       |
| Goodness of fit on <i>F</i> <sup>2</sup>                                 | 1.090                                                                                                         | 1.035                                                                                        |
| $\Delta\rho_{\text{max}}$ $\Delta\rho_{\text{min}}$ [e.Å <sup>-3</sup> ] | 0.587, -0.564                                                                                                 | 0.623, -0.483                                                                                |

**Table S6.** Natural Bond Orbital (NBO) and Mulliken analysis of atomic charges on Fe1, Fe2 and Fe3 atoms in **1** and **3**.

| <b>3</b> | Fe1   | Fe2   | Fe3   |
|----------|-------|-------|-------|
| Mulliken | -0.42 | -0.26 | -0.62 |
| NBO      | -0.18 | +0.03 | -0.20 |

  

| <b>1</b> | Fe1   | Fe2   | Fe3   |
|----------|-------|-------|-------|
| Mulliken | -0.40 | -0.25 | -0.62 |
| NBO      | -0.18 | +0.01 | -0.22 |



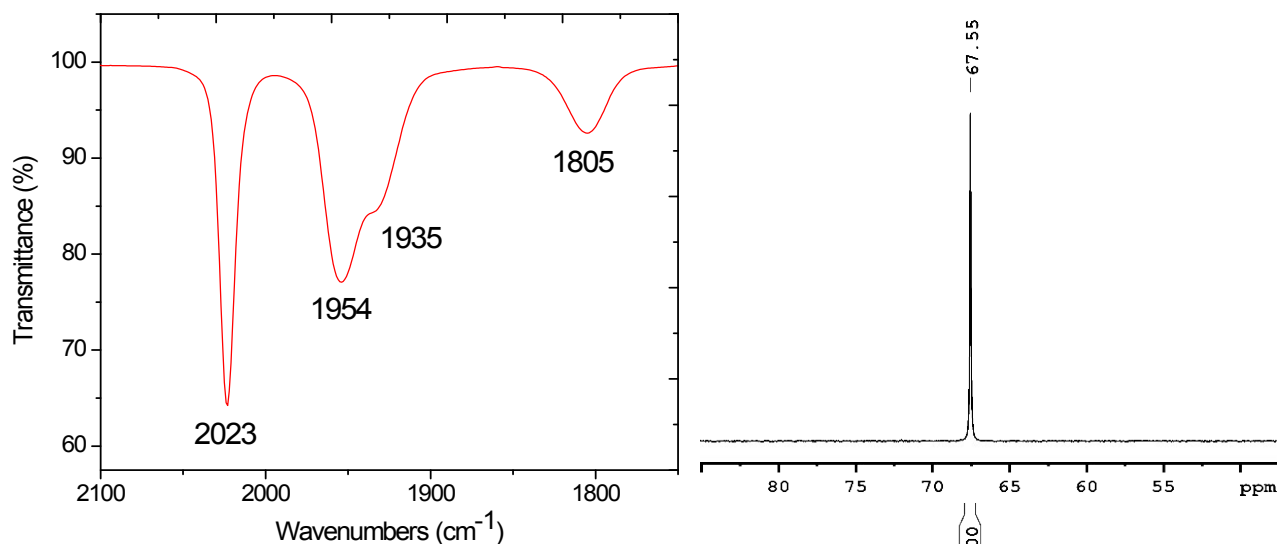

(a)

(b)

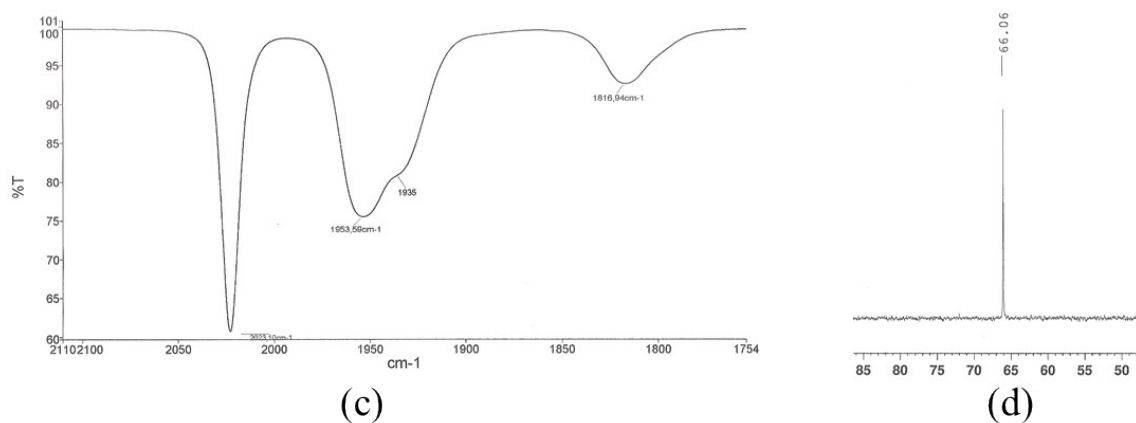

(c)

(d)

**Figure S3.** (a) IR ( $\text{CH}_2\text{Cl}_2$ ) and (b)  $^{31}\text{P}\{^1\text{H}\}$  NMR ( $\text{CDCl}_3$ ) spectra of **2** at  $25^\circ\text{C}$ ; (c) IR ( $\text{CH}_2\text{Cl}_2$ ) and (d)  $^{31}\text{P}\{^1\text{H}\}$  NMR ( $\text{CDCl}_3$ ) spectra of **3** at  $25^\circ\text{C}$ .

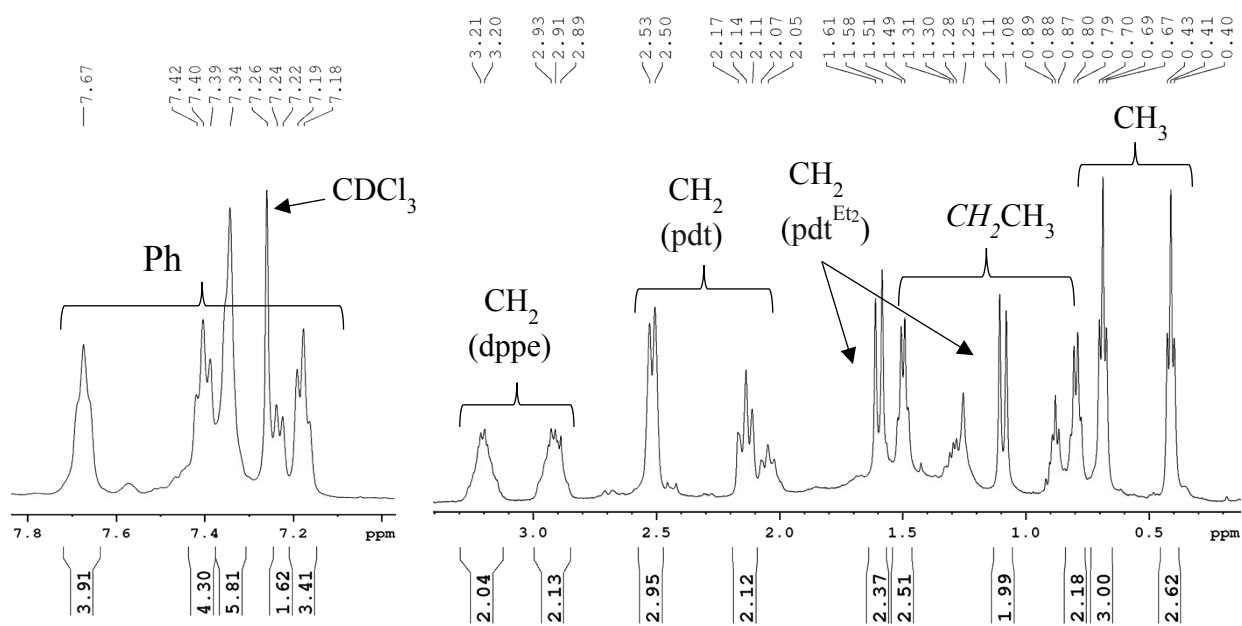

(a)

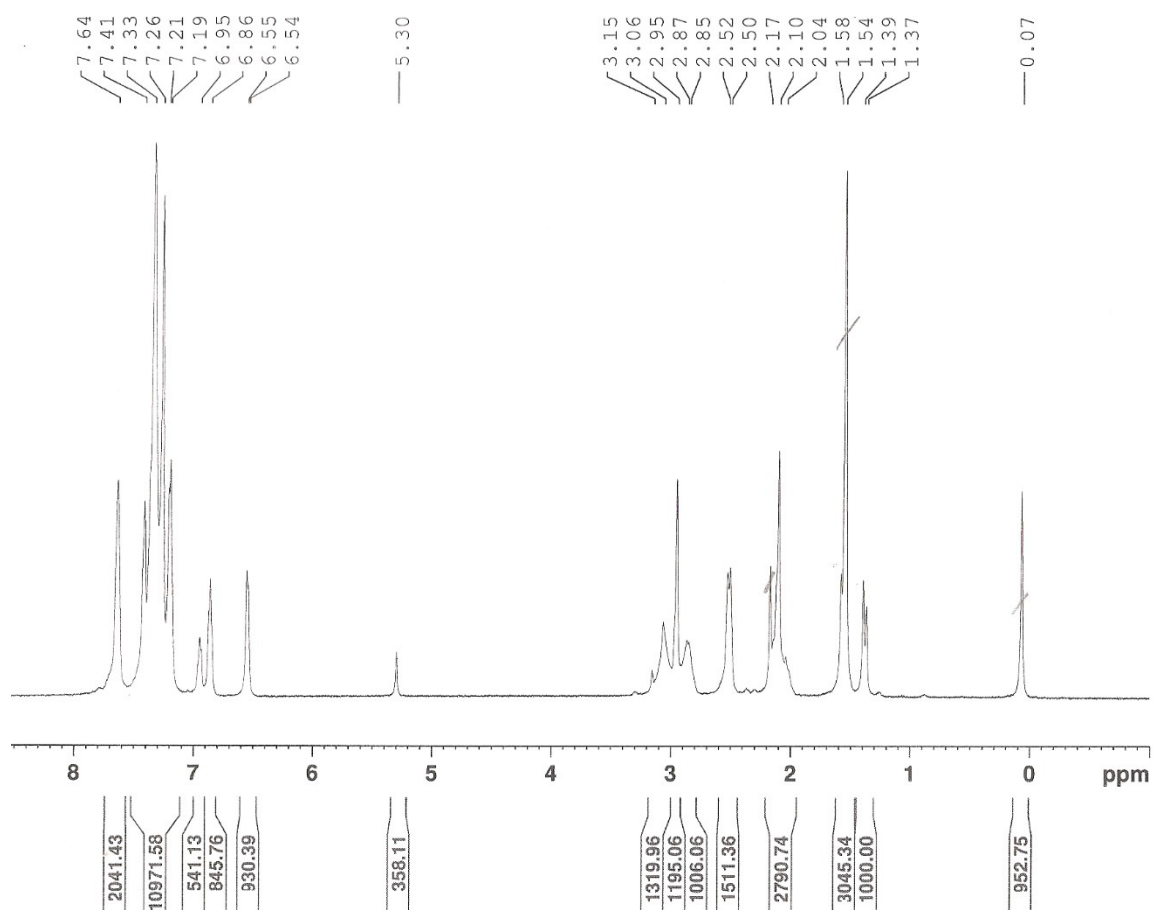

(b)

Figure S4. <sup>1</sup>H NMR spectrum of **2** (a) and **3** (b) in CDCl<sub>3</sub> at 25°C.

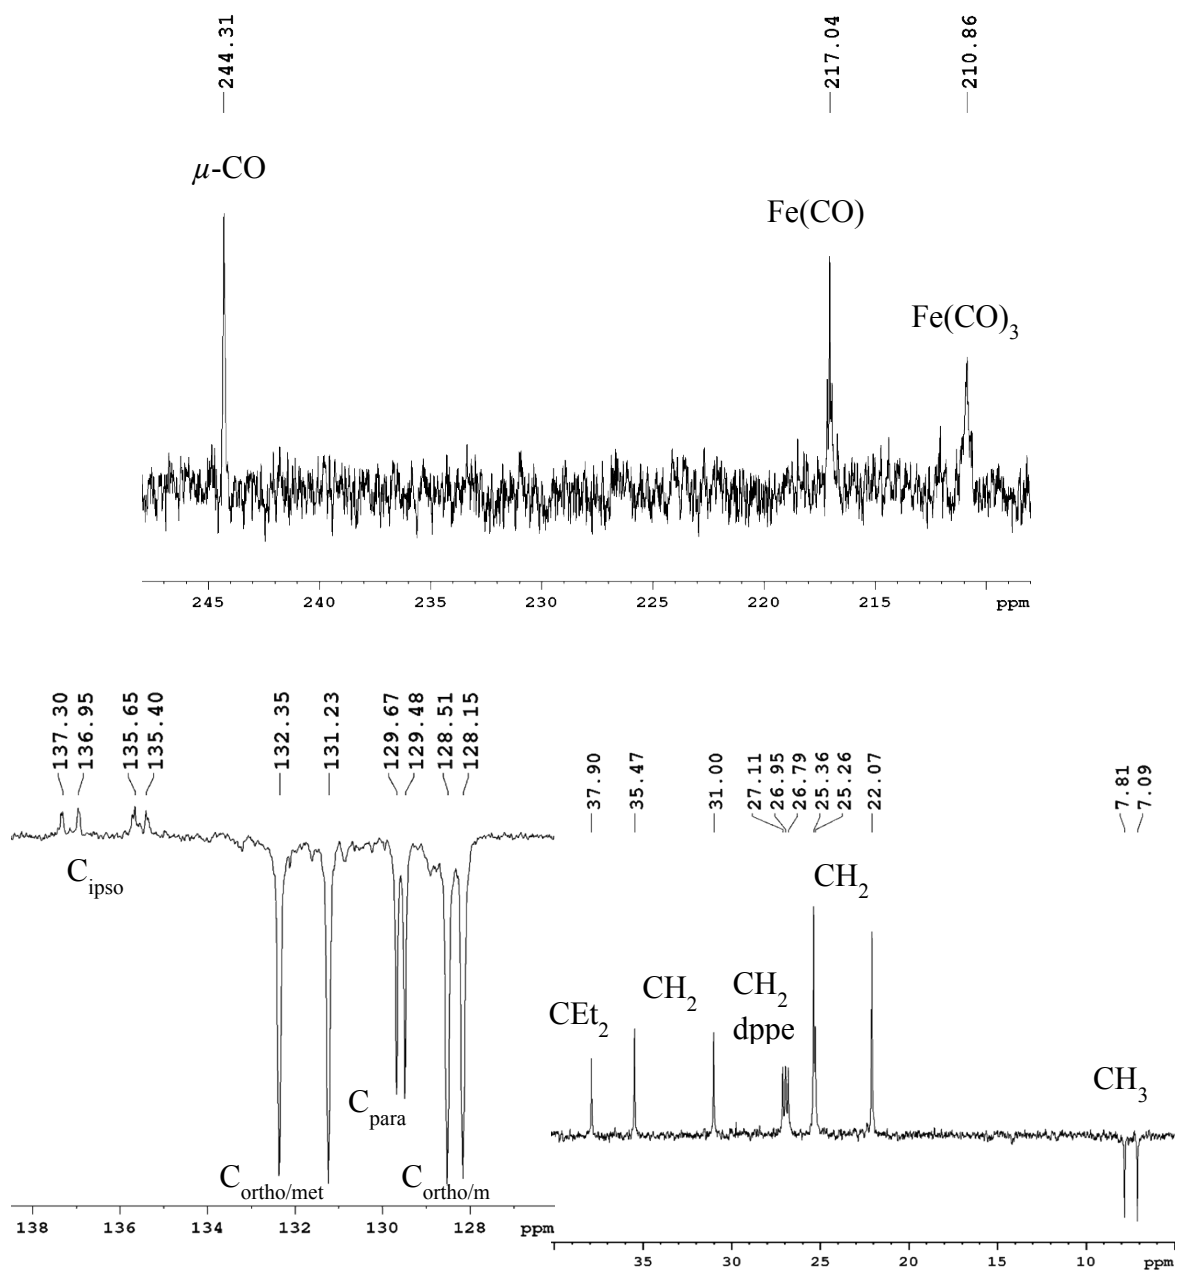

**Figure S5.**  $^{13}\text{C}\{^1\text{H}\}$  (Jmod) NMR spectrum of **2** in  $\text{CDCl}_3$ .

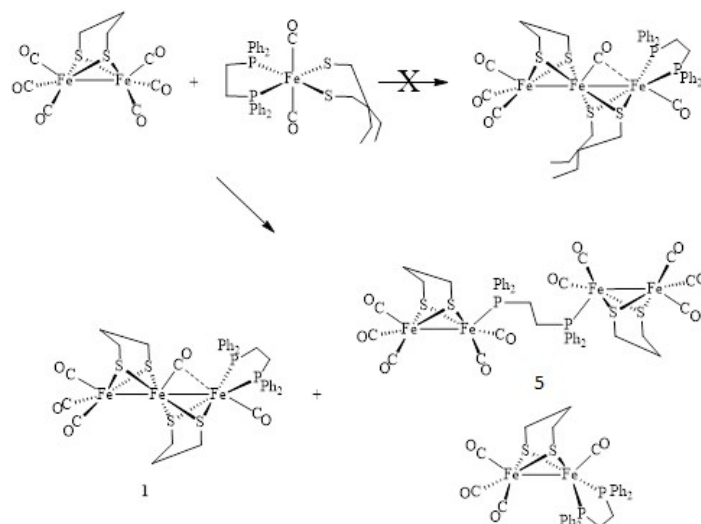

**Scheme S1.** Reaction between  $[\text{Fe}_2(\text{CO})_6(\mu\text{-pdt})]$  and  $[\text{Fe}(\text{CO})_2(\kappa^2\text{-dppe})(\kappa^2\text{-pdt}^{\text{Et}2})]$ .

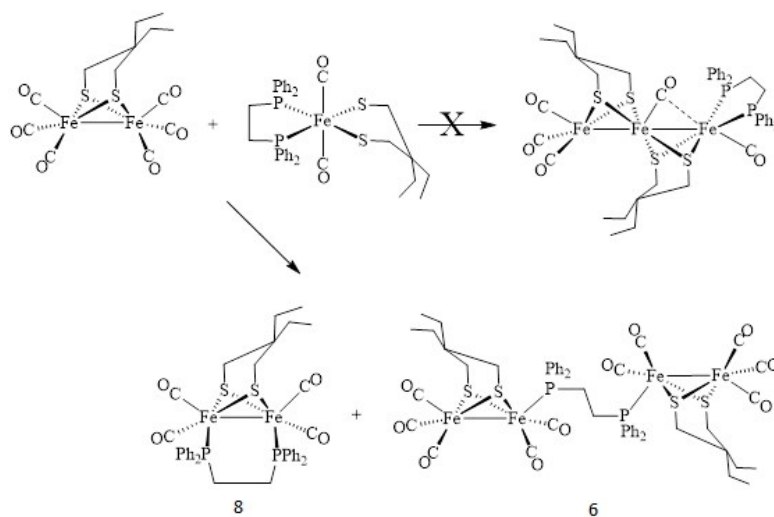

**Scheme S2.** Reaction between  $[\text{Fe}_2(\text{CO})_6(\mu\text{-pdt}^{\text{Et}2})]$  and  $[\text{Fe}(\text{CO})_2(\kappa^2\text{-dppe})(\kappa^2\text{-pdt}^{\text{Et}2})]$ .

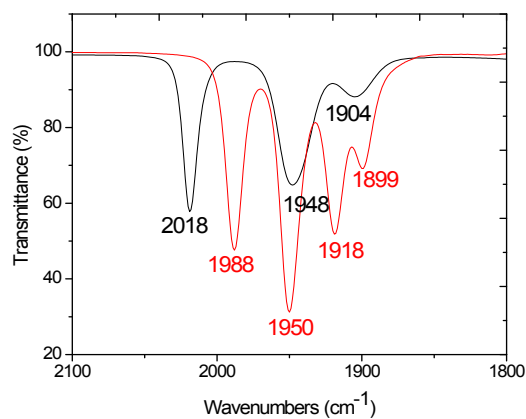

**Figure S6.** IR ( $\text{CH}_2\text{Cl}_2$ ) spectra of  $[\text{Fe}_2(\text{CO})_4(\kappa^2\text{-dppe})(\mu\text{-pdt})]$  (black curve) and  $[\text{Fe}_2(\text{CO})_4(\kappa^2\text{-dppe})(\mu\text{-pdt}^{\text{Et}2})]$  (8) (red curve).

**Spectroscopic data for [Fe<sub>2</sub>(CO)<sub>4</sub>(μ-dppe)(μ-pdt<sup>Et2</sup>)] (8)**

IR (CH<sub>2</sub>Cl<sub>2</sub>, cm<sup>-1</sup>) :  $\bar{\nu}_{\text{CO}}$  = 1988 (s), 1950 (vs), 1918 (s), 1899 (m).

<sup>31</sup>P-<sup>1</sup>H} NMR (CDCl<sub>3</sub>, ppm) :  $\delta$  = 61.4 (s, dppe).

<sup>1</sup>H NMR (CDCl<sub>3</sub>, ppm) :  $\delta$  = 7.65 – 7.38 (m, 20H, C<sub>6</sub>H<sub>5</sub>), 2.35 (m, 4H, dppe), 2.20 (m, CH<sub>2</sub>, pdt<sup>Et2</sup>), 1.62 (q, <sup>3</sup>J<sub>HH</sub> = 7.2 Hz, 4H, CH<sub>2</sub>CH<sub>3</sub>), 0.82 (6H, t, <sup>3</sup>J<sub>HH</sub> = 7.2 Hz, CH<sub>3</sub>).

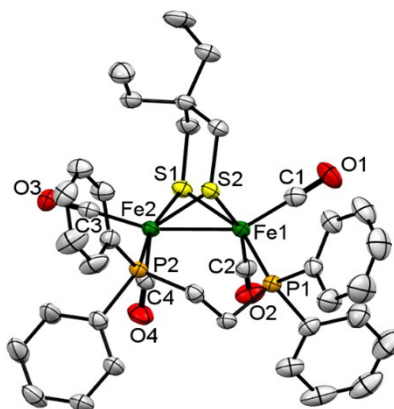

**Figure S7.** ORTEP view of [Fe<sub>2</sub>(CO)<sub>4</sub>(μ-dppe)(μ-pdt<sup>Et2</sup>)] (8)

**Table S7.** Selected distances and bond angles for 8.

|              |            | 8          |
|--------------|------------|------------|
| Distance (Å) | Fe1-Fe2    | 2.5248(7)  |
|              | Fe1-S1     | 2.2660(10) |
|              | Fe1-S2     | 2.2623(10) |
|              | Fe2-S1     | 2.2546(9)  |
|              | Fe2-S2     | 2.2768(10) |
|              | Fe1-P1     | 2.2221(10) |
|              | Fe2-P2     | 2.2117(10) |
|              | Angles (°) | Fe1-Fe2-C3 |
| Fe2-Fe1-C1   |            | 148.30(13) |
| Fe1-S1-Fe2   |            | 67.91(5)   |
| Fe1-S2-Fe2   |            | 67.59(3)   |

**Table S8.** Crystallographic data of  $[\text{Fe}_2(\text{CO})_4(\mu\text{-dppe})(\mu\text{-pdt}^{\text{Et}_2})]_2 \cdot 2\text{CH}_2\text{Cl}_2$  (**8**)

|                                                                                         | <b><math>[\text{Fe}_2(\text{CO})_4(\mu\text{-dppe})(\mu\text{-pdt}^{\text{Et}_2})]_2 \cdot 2\text{CH}_2\text{Cl}_2</math></b> |
|-----------------------------------------------------------------------------------------|-------------------------------------------------------------------------------------------------------------------------------|
| Empirical formula                                                                       | $\text{C}_{82}\text{H}_{94}\text{Cl}_4\text{Fe}_4\text{O}_8\text{P}_4\text{S}_4$                                              |
| Formula weight                                                                          | 1824.89                                                                                                                       |
| Temperature/ K                                                                          | 170(2)                                                                                                                        |
| Wavelength/Å                                                                            | 0.71073                                                                                                                       |
| Crystal system                                                                          | Triclinic                                                                                                                     |
| Space group                                                                             | P-1                                                                                                                           |
| <i>a</i> (Å)                                                                            | 11.7315(4)                                                                                                                    |
| <i>b</i> (Å)                                                                            | 13.1271(4)                                                                                                                    |
| <i>c</i> (Å)                                                                            | 15.1143(5)                                                                                                                    |
| $\alpha$ (°)                                                                            | 97.110(3)                                                                                                                     |
| $\beta$ (°)                                                                             | 110.969(3)                                                                                                                    |
| $\gamma$ (°)                                                                            | 91.627(3)                                                                                                                     |
| <i>V</i> (Å <sup>3</sup> )                                                              | 2150.10(12)                                                                                                                   |
| <i>Z</i>                                                                                | 1                                                                                                                             |
| $\rho_{\text{calc}}$ (Mg/mm <sup>3</sup> )                                              | 1.409                                                                                                                         |
| $\mu$ (mm <sup>-1</sup> )                                                               | 1.009                                                                                                                         |
| F(000)                                                                                  | 946                                                                                                                           |
| Crystal size (mm)                                                                       | 0.57 x 0.36 x 0.23                                                                                                            |
| Crystal color                                                                           | Red                                                                                                                           |
| Crystal shape                                                                           | Block                                                                                                                         |
| Range of $\theta$ (°)                                                                   | 3.48 to 26.37                                                                                                                 |
| Limiting indices                                                                        | $-10 \leq h \leq 14, -16 \leq k \leq 15, -18 \leq l \leq 12$                                                                  |
| Reflections collected/unique                                                            | 14652 / 8791                                                                                                                  |
| $R_{\text{int}}$                                                                        | 0.0473                                                                                                                        |
| Completeness to $\theta = 26.37$                                                        | 99.6 %                                                                                                                        |
| Absorption correction                                                                   | Semi-empirical from equivalents                                                                                               |
| Max. / Min. Transmission                                                                | 0.8010 / 0.5969                                                                                                               |
| Refinement method                                                                       | Full-matrix least-squares on $F^2$                                                                                            |
| Data /Restraints /Parameters                                                            | 8791 / 38 / 501                                                                                                               |
| $R_1$ [ $I > 2\sigma(I)$ ]                                                              | 0.0563                                                                                                                        |
| $wR_2$ [ $I > 2\sigma(I)$ ]                                                             | 0.1589                                                                                                                        |
| $R_1$ (all data)                                                                        | 0.0694                                                                                                                        |
| $wR_2$ (all data)                                                                       | 0.1752                                                                                                                        |
| Goodness of fit on $F^2$                                                                | 1.036                                                                                                                         |
| $\Delta\rho_{\text{max}}, \Delta\rho_{\text{min}}$ [ $\text{e} \cdot \text{\AA}^{-3}$ ] | 1.151, -1.136                                                                                                                 |

**Figure S8.** HOMO-1, HOMO-2 and HOMO-3 of **1**.

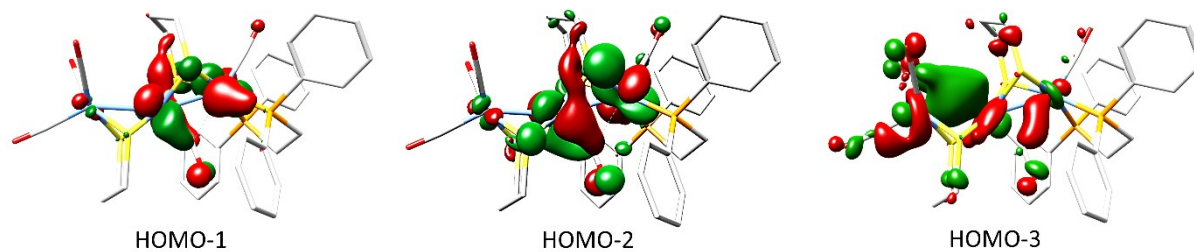

**Table S9.** Energy (eV) of the HOMO and LUMO orbitals of the complexes **1-4, 9**

| Complex  | HOMO   | LUMO   |
|----------|--------|--------|
| <b>1</b> | -4.353 | -3.031 |
| <b>2</b> | -4.329 | -3.011 |
| <b>3</b> | -4.338 | -3.013 |
| <b>4</b> | -4.381 | -3.038 |
| <b>9</b> | -4.555 | -2.995 |

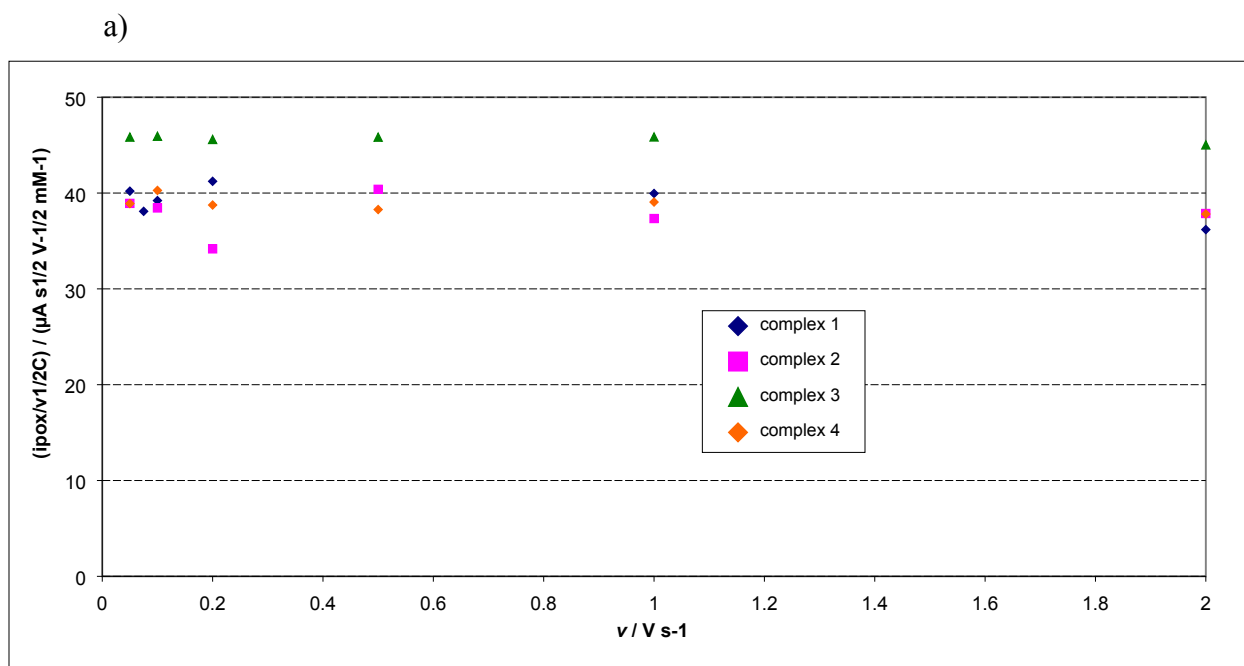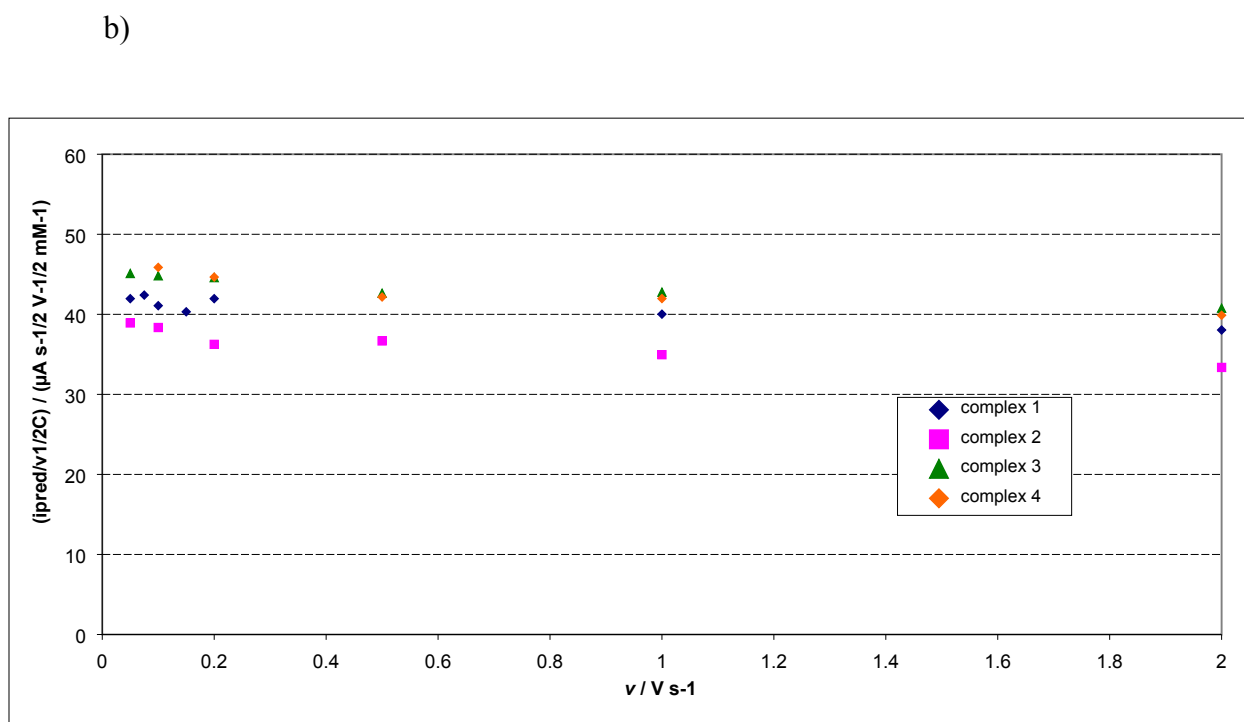

**Figure S9.** Scan rate dependence of the current function for the oxidation (a) and the reduction (b) of complexes 1-4 under inert atmosphere in  $CH_2Cl_2$ - $[NBu_4][PF_6]$  0.2 M.



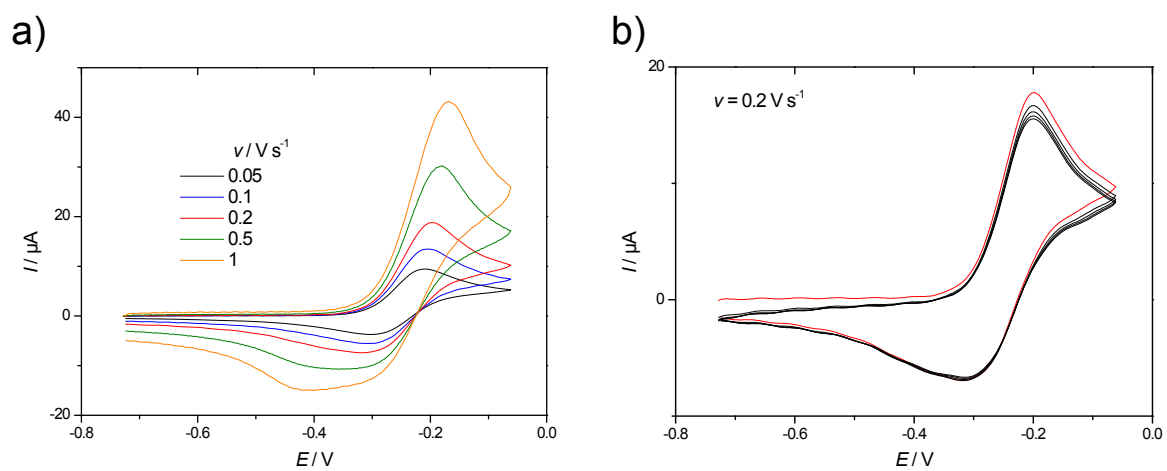

**Figure S10.** a) Oxidation of  $[\text{Fe}_3(\text{CO})_5(\kappa^2\text{-dppe})(\mu\text{-pdt}^{\text{Bn}2})(\mu\text{-pdt})]$  (**3**) (0.91 mM) under inert atmosphere in  $\text{CH}_2\text{Cl}_2\text{-}[\text{NBu}_4][\text{PF}_6]$  0.2 M at different scan rates. b) Successive cyclic voltammograms at  $0.2 \text{ V s}^{-1}$ .

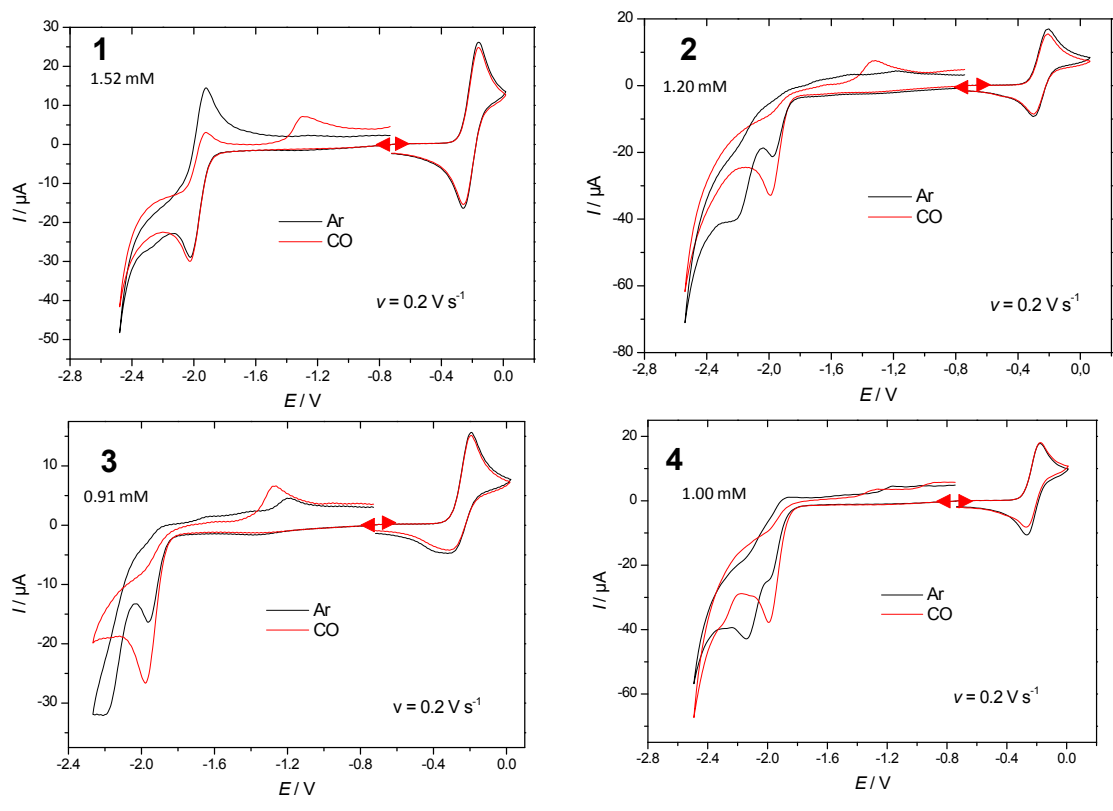

**Figure S11.** Comparison between cyclic voltammetry under Ar and CO for complexes **1-4** in  $\text{CH}_2\text{Cl}_2$ - $[\text{NBu}_4][\text{PF}_6]$   $0.2 \text{ M}$  at  $v = 0.2 \text{ V s}^{-1}$ .

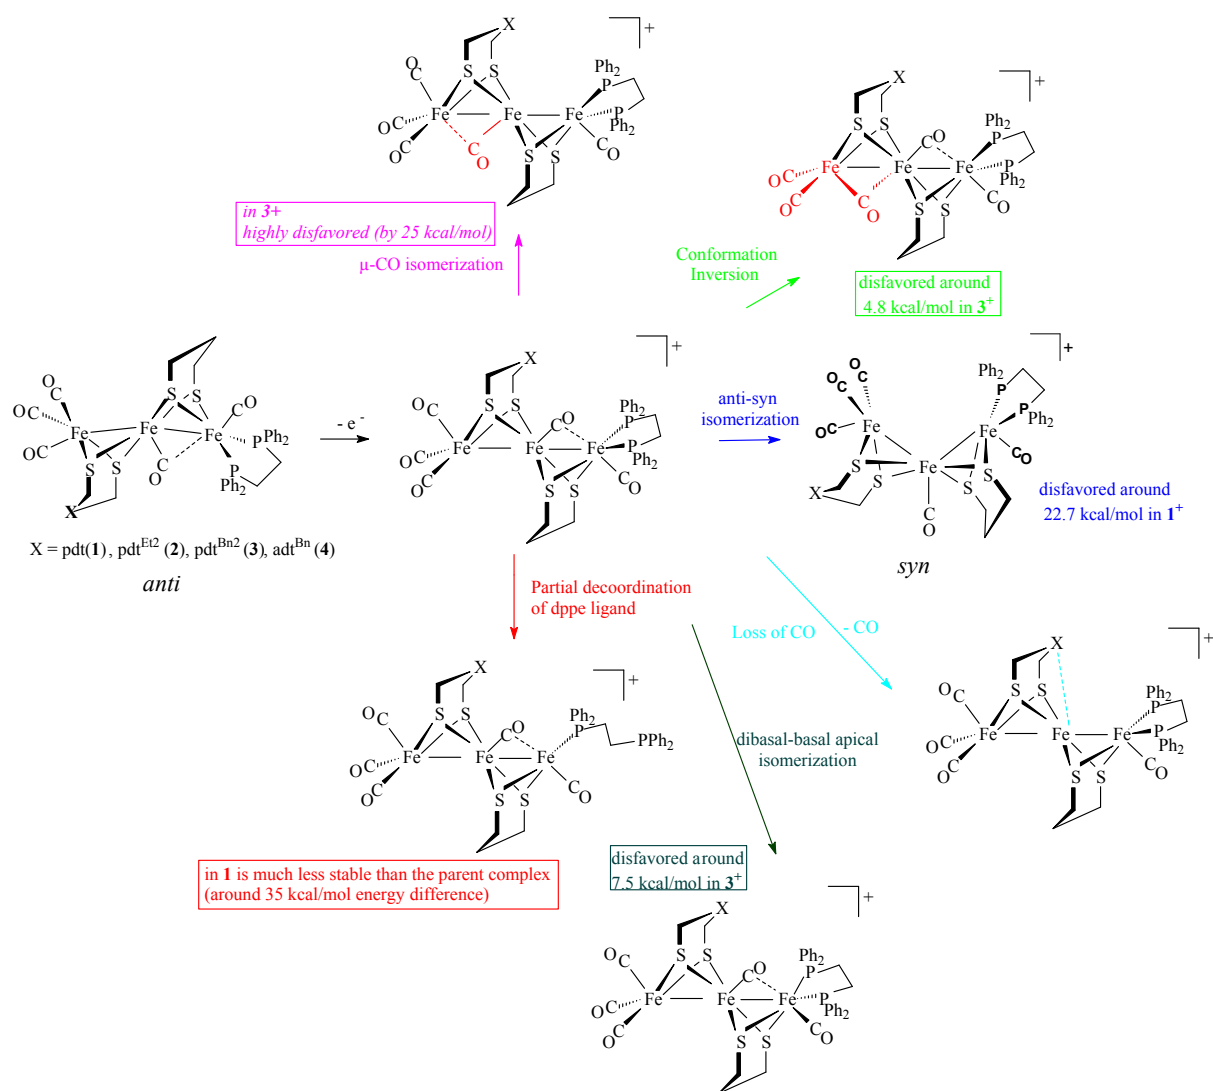

**Scheme S3.** Hypotheses for the reaction associated to the oxidation of triiron complexes

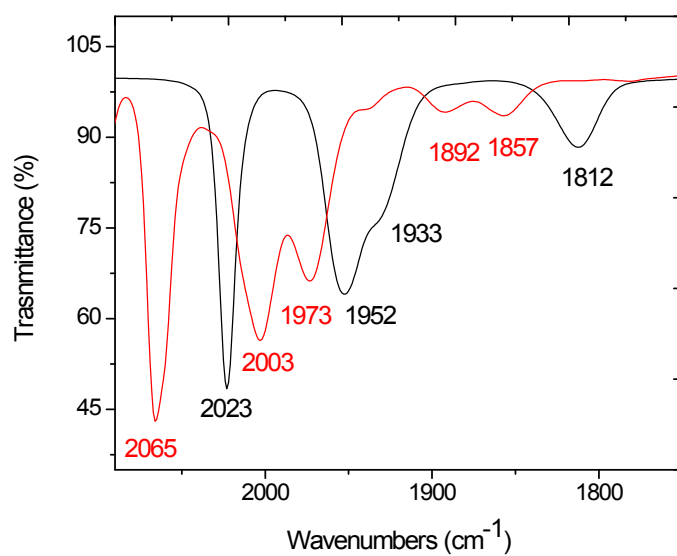

**Figure S12.** IR monitoring of the reaction of **1** in CH<sub>2</sub>Cl<sub>2</sub> at -60°C with 1 equiv. of [FeCp<sub>2</sub>][BAr<sup>F</sup><sub>4</sub>] (black curve: before; red curve: after addition of [FeCp<sub>2</sub>][BAr<sup>F</sup><sub>4</sub>]).

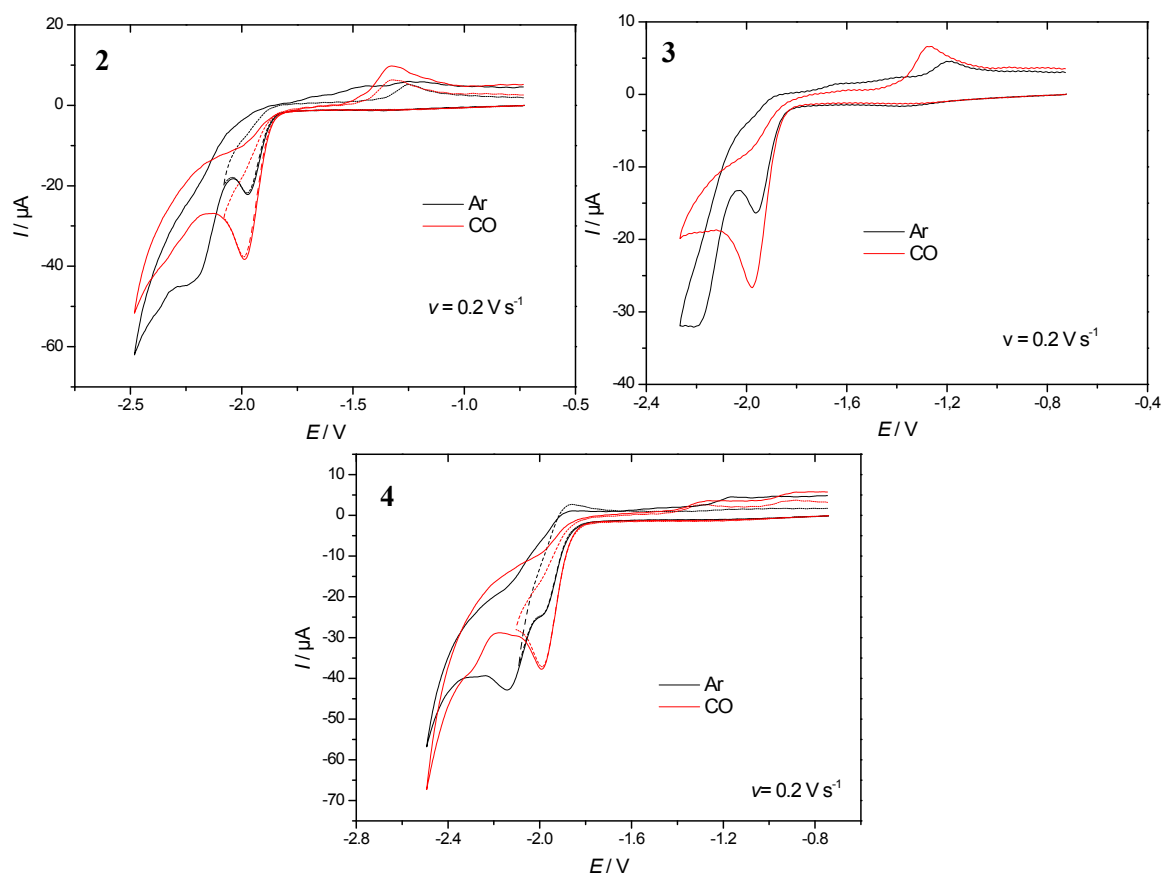

**Figure S13.** Reduction of **2** (1.20 mM), **3** (0.91 mM) and **4** (1.50 mM) in  $\text{CH}_2\text{Cl}_2$ - $[\text{NBu}_4][\text{PF}_6]$  0.2 M at  $0.2 \text{ V s}^{-1}$  under Ar and CO.

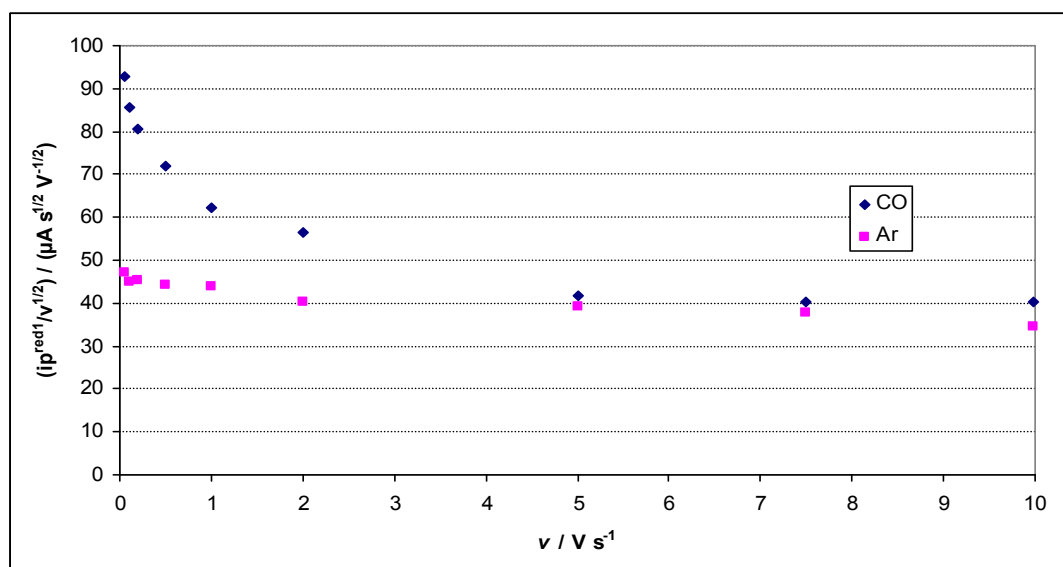

**Figure S14.** Scan rate dependence of the reduction current functions ( $i_p^{\text{red}} / v^{1/2}$ ) for the reduction of **2** (1.20 mM) in  $\text{CH}_2\text{Cl}_2$ - $[\text{NBu}_4][\text{PF}_6]$  0.2 M under Ar and CO.

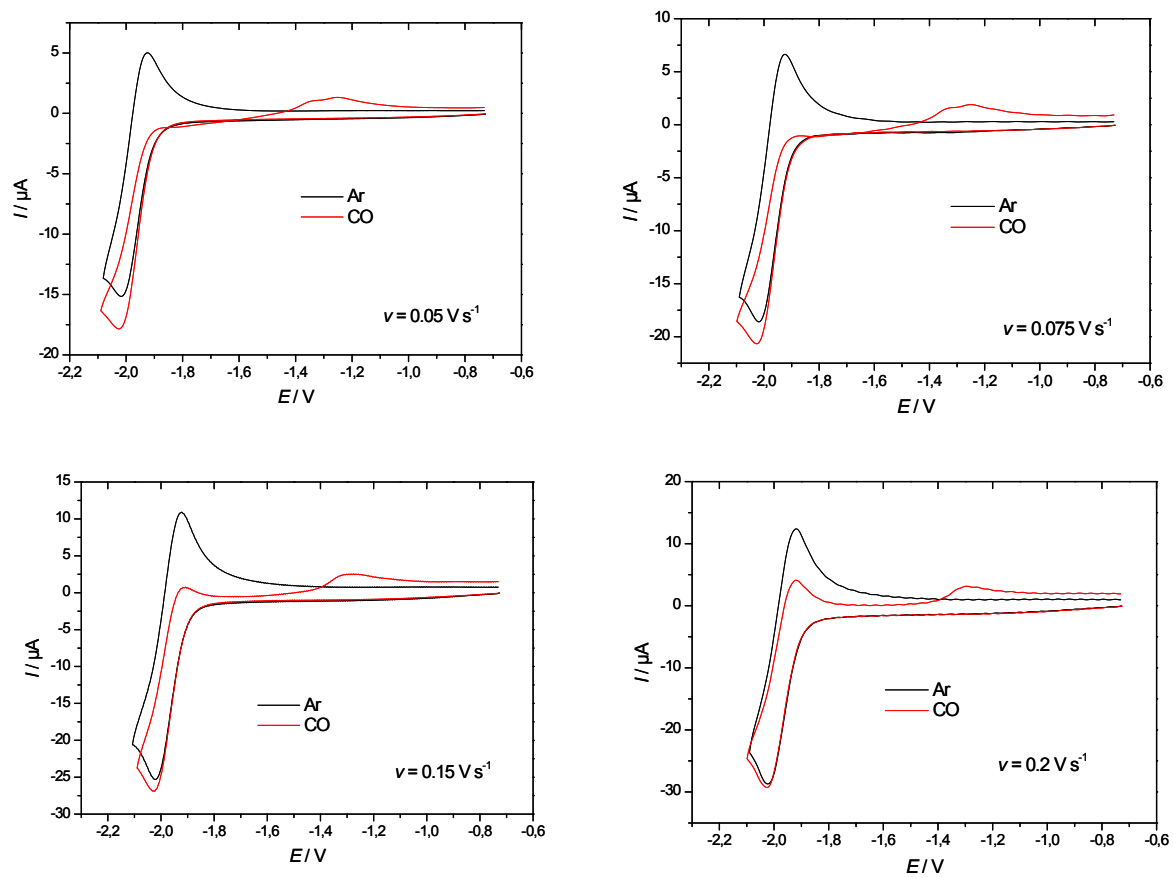

**Figure S15.** Reduction of  $[\text{Fe}_3(\text{CO})_5(\kappa^2\text{-dppe})(\mu\text{-pdt})_2]$  (1) (1.52 mM) under Ar and CO in  $\text{CH}_2\text{Cl}_2\text{-}[\text{NBu}_4][\text{PF}_6]$  0.2 M at slow scan rates.

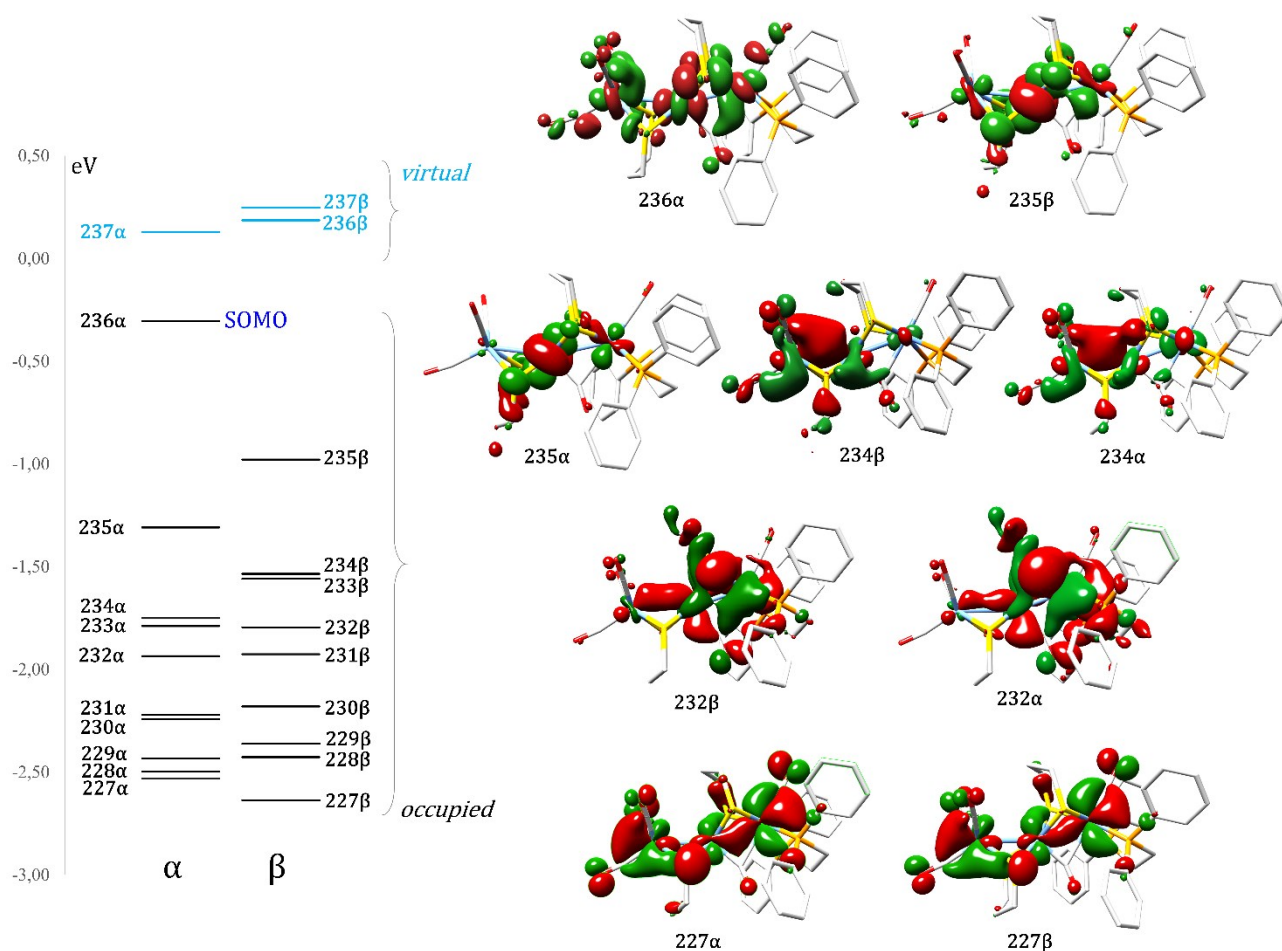

**Figure S16.** MO's energy diagram (left). Representation of MO discussed in the text (right).

Inspection of molecular orbitals shows that there are several orbitals with FeFe binding character : those in which this is evident are the following: 234 $\alpha$ , 234 $\beta$ , 232 $\alpha$ , 232 $\beta$  for the FeFe pair including Fe2 and Fe3; 227 $\alpha$  and 227 $\beta$  for the pair formed by the central iron atom and by the diphosphine-bound to the iron Fe1. As far as the rationalization of the computed spin populations at iron atoms is concerned, visual inspection of the three higher energy, singly occupied orbitals can justify in a qualitative way the delocalized picture coming from population analysis. In fact, the SOMO (i.e. 236 $\alpha$ ), which has antibonding character relative to iron atoms, shows that there is alpha density distributed over the three Fe atoms, with a slight preponderance at the iron Fe2. In any case, to understand why the spin population value is significantly higher on the latter Fe centre, one has to look also at the two singly occupied orbitals just below the SOMO, i.e. 235 $\beta$  and 235 $\alpha$ .

These two orbitals are very similar to each other in correspondence of the central iron atom, and hence they have little overall effect in determining the spin population of the latter iron centre. However, the 235 $\beta$  orbital has significant contributions from the atomic orbitals

centered at Fe1, as well as from those centered on Fe3. Since the latter orbital is occupied by a  $\beta$ -spin electron, it contributes to lower the overall spin population value of the latter two irons. As far as the “building-up” of the  $235\alpha$  orbital is concerned, the atomic orbitals centered on Fe3 contribute in a negligible way, whereas the atomic orbitals of the diphosphine-bound Fe1 contribute in a significant way. However, the latter contribution is less pronounced than the one of atomic orbitals centered on Fe1, as far as the building up of  $235\beta$  orbital is concerned. Therefore, orbitals  $235\beta$  and  $235\alpha$  together add a significant amount of beta density on Fe3, reducing its spin population to a value that is close to be negligible (0.12). Actually, orbitals  $235\beta$  and  $235\alpha$  have an overall effect of adding beta density also at the level of Fe1, although to a lesser extent than in the previous case. Such observation – together with the previous ones on the negligible effects of  $235\beta$  and  $235\alpha$  orbitals in determining the spin population of Fe2 – makes sense of the fact that the spin population value of the latter iron atom is higher than that of Fe3, and lower than that of Fe2. Obviously, this discussion is qualitative, because it ignores the contributions due to all the differences between pairs of alpha and beta orbitals placed at deeper energies with respect to  $235\alpha$ . These differences actually exist, but based on visual inspection it is clear that around the Fe atoms such differences are generally small or very small for all those orbitals. The latter consideration further justifies our choice of focusing on SOMO,  $235\beta$  and  $235\alpha$  to get a rationalization of the computed spin densities at the Fe ions.

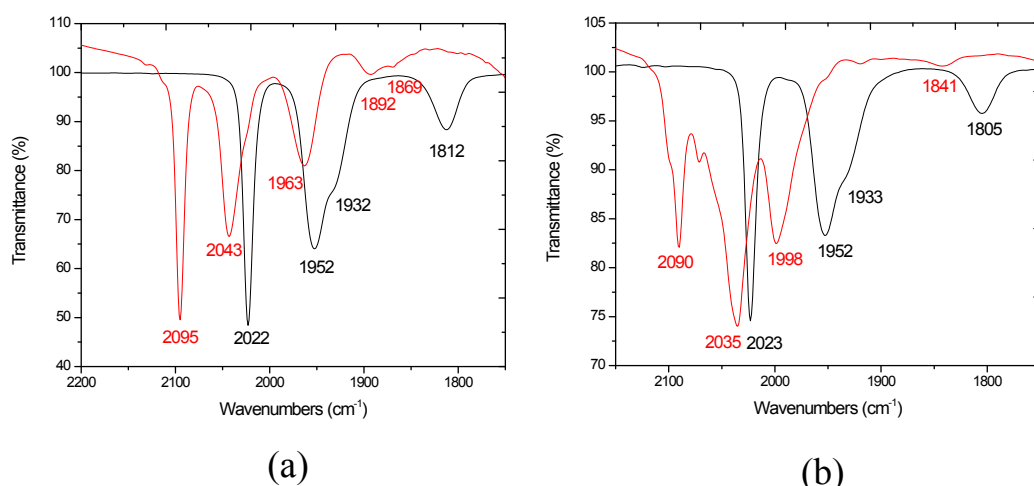

**Figure S17.** IR monitoring of the reaction of **1** (a), **2** (b) with 2 equiv. of  $\text{HBF}_4 \cdot \text{Et}_2\text{O}$  at  $-80^\circ\text{C}$  in  $\text{CH}_2\text{Cl}_2$  (black curve: before; red curve: after addition of acid).



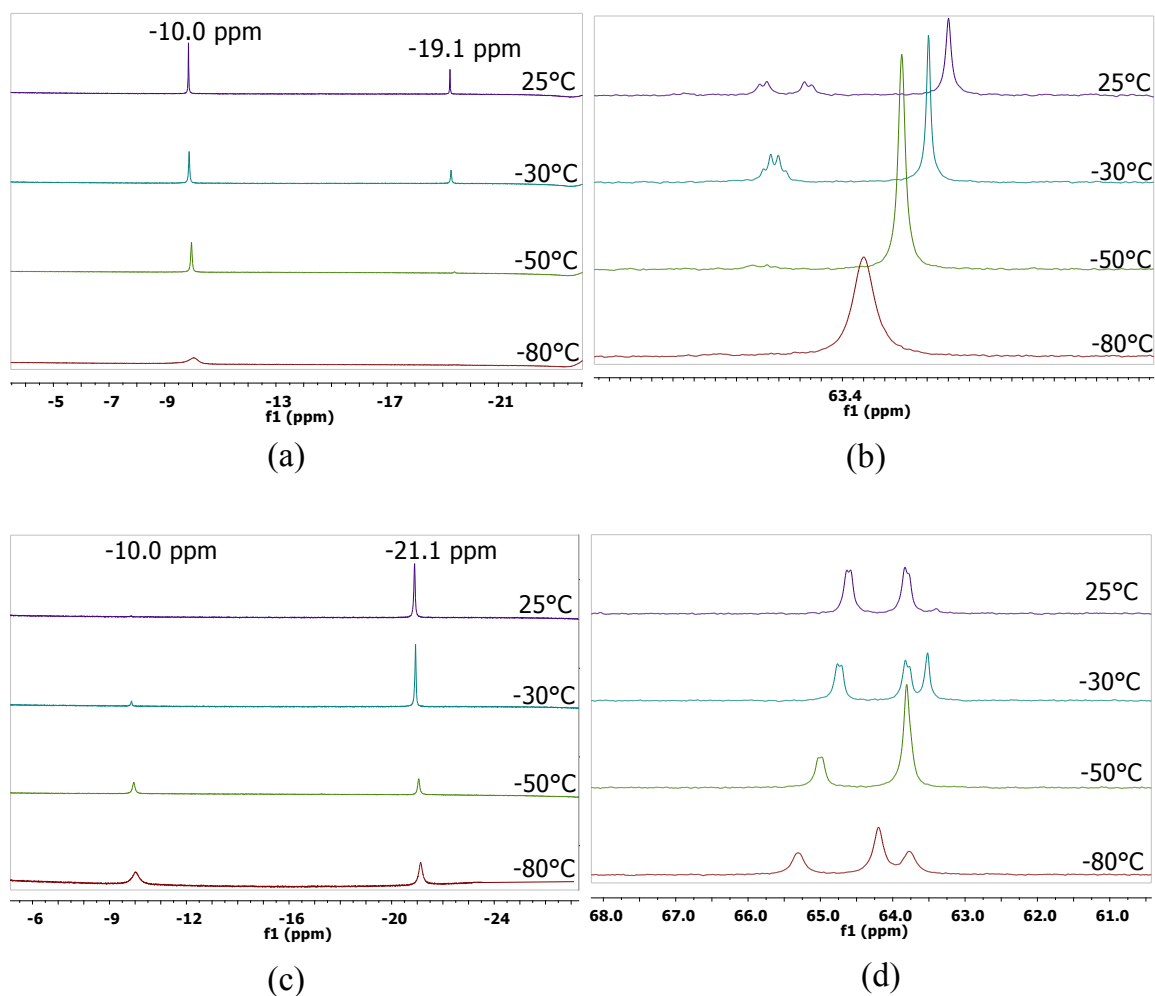

**Figure S18.**  $^1\text{H}$  (a), (c) and  $^{31}\text{P}\{^1\text{H}\}$  (b), (d) NMR monitoring, at variable temperature, of the reaction of **1** (a), (b), **2** (c), (d) in the presence of 2 equiv.  $\text{HBF}_4 \cdot \text{Et}_2\text{O}$  in  $\text{CD}_2\text{Cl}_2$ .

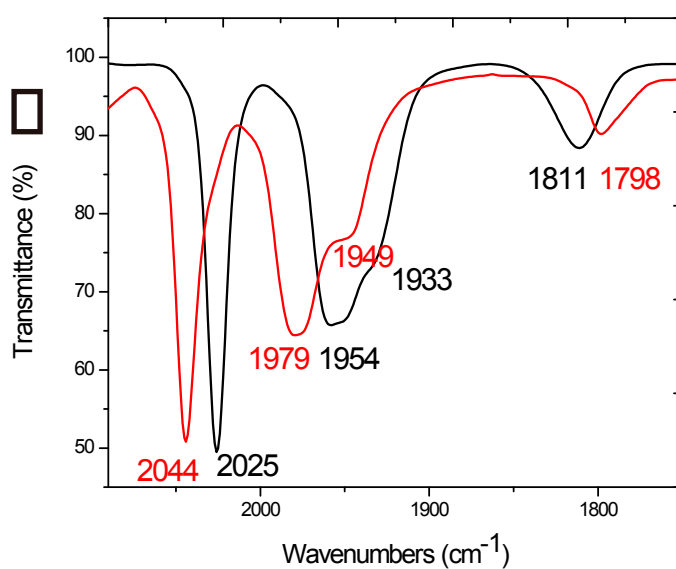

**Figure S19.** IR monitoring of the reaction of **4** with  $\text{HBF}_4 \cdot \text{Et}_2\text{O}$  (2 equiv) at  $25^\circ\text{C}$  in  $\text{CH}_2\text{Cl}_2$  (black curve: before; red curve: after addition of acid).

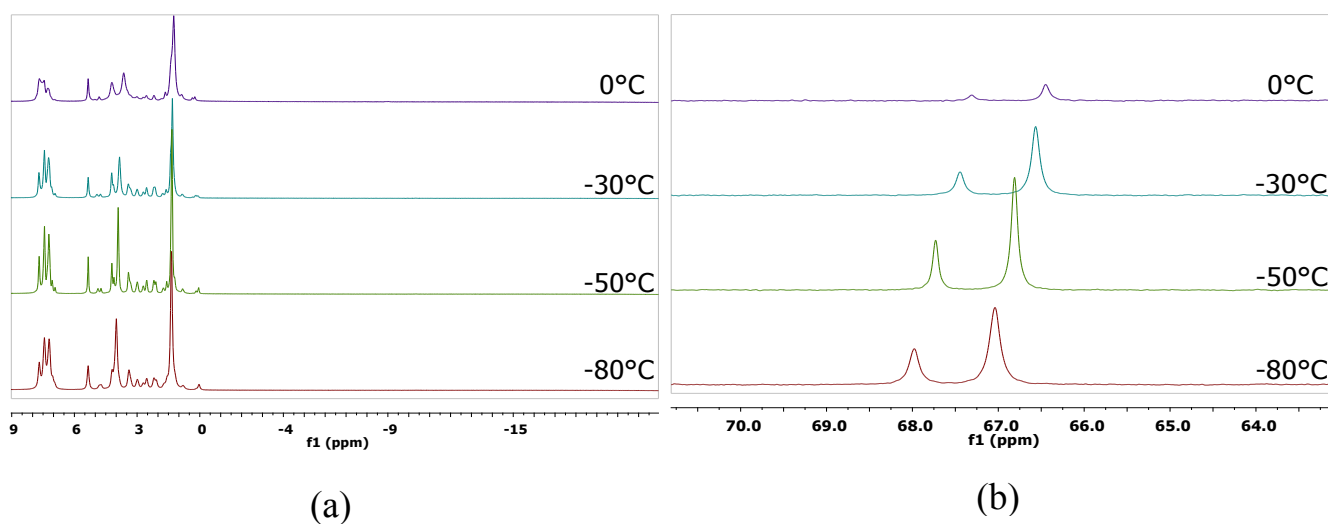

**Figure S20.**  $^1\text{H}$  (a) and  $^{31}\text{P}\{^1\text{H}\}$  (b) NMR monitoring, at variable temperature, of the reaction of **4** in the presence of 2 equiv. of  $\text{HBF}_4\cdot\text{Et}_2\text{O}$  in  $\text{CD}_2\text{Cl}_2$ .

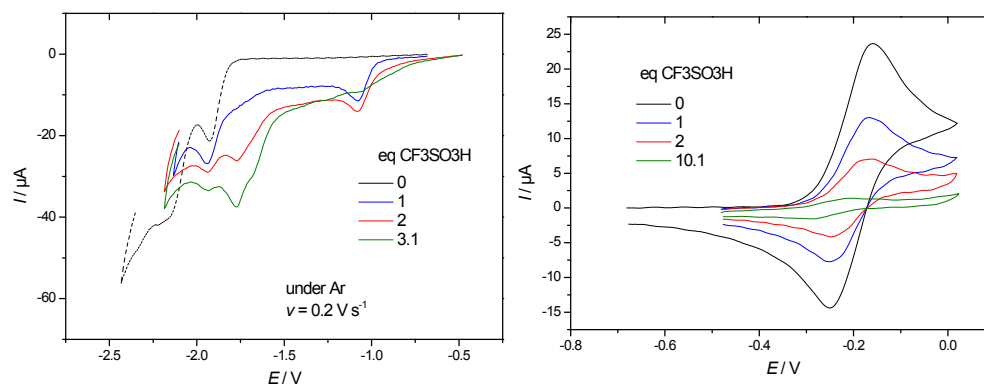

**Figure S21.** Cyclic voltammetry of  $[\text{Fe}_3(\text{CO})_5(\kappa^2\text{-dppe})(\mu\text{-pdt}^{\text{Et}_2})(\mu\text{-pdt})]$  (**2**) ( $C = 1.20 \text{ mM}$ ) in presence of  $\text{CF}_3\text{SO}_3\text{H}$  in  $\text{CH}_2\text{Cl}_2\text{-}[\text{NBu}_4][\text{PF}_6]$   $0.2 \text{ M}$  at  $\nu = 0.2 \text{ V s}^{-1}$  under Ar.

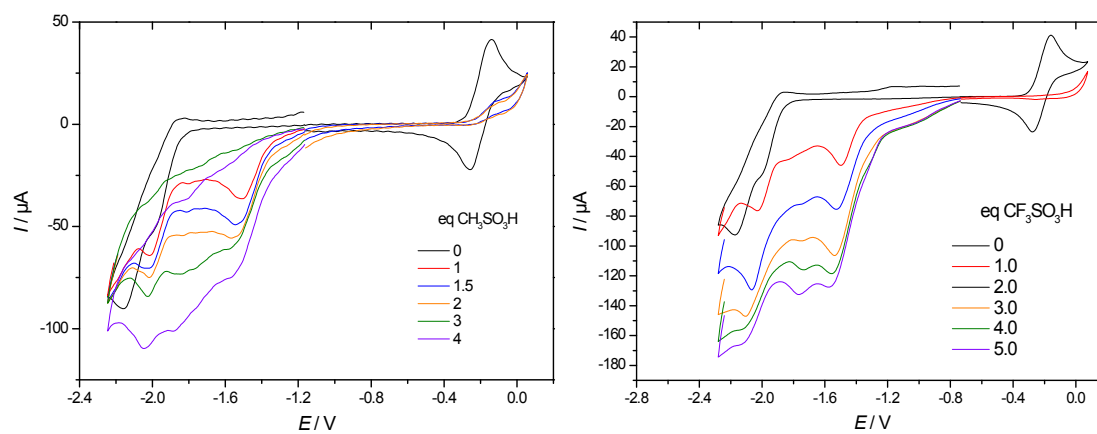

**Figure S22.** Cyclic voltammetry of **4** ( $2.2 \text{ mM}$ ) in presence of  $\text{CH}_3\text{SO}_3\text{H}$  (left) and  $\text{CF}_3\text{SO}_3\text{H}$  (right) in  $\text{CH}_2\text{Cl}_2\text{-}[\text{NBu}_4][\text{PF}_6]$   $0.2 \text{ M}$ .
